# Supplementary material for: High-Throughput Sequencing Reveals the Regulatory Networks of Transcriptome and Small RNAs During the Defense Against Marssonina brunnea in Poplar
Source: Front Plant Sci. 2021 Sep 8;12:719549. doi: 10.3389/fpls.2021.719549 (PMC8456019; doi:10.3389/fpls.2021.719549)
Supplement: Supplementary file 1 [file Table_1.XLSX]

## Sheet: Sheet1
Table S1. Summary of the RNA-seq data obtained from different samples.
Sample	Reads No.	Bases (bp)	Q30 (bp)	N(%)	Q20(%)	Q30(%)	Clean Reads No.	Clean Data (bp)	Clean Reads %	Clean Data %	Total_Mapped	Multiple_Mapped	Uniquely_Mapped
Mk_6h_1	44335582	6659423860	6254800360	0.000874	97.73	93.92	40893478	6142395198	92.23	92.23	36953629 (90.37%)	2828228 (7.65%)	34125401 (92.35%)
Mk_6h_2	44806904	6729451840	6310605466	0.000901	97.66	93.77	41398298	6217510706	92.39	92.39	37453555 (90.47%)	2917148 (7.79%)	34536407 (92.21%)
Mk_6h_3	41550380	6232557000	5864592234	0.001048	97.83	94.09	38410968	5761645200	92.44	92.44	34729383 (90.42%)	2703024 (7.78%)	32026359 (92.22%)
Mb_6h_1	42507902	6385706660	5981031883	0.000859	97.61	93.66	39250688	5896388404	92.33	92.33	35236960 (89.77%)	2803794 (7.96%)	32433166 (92.04%)
Mb_6h_2	44420670	6672584650	6195886420	0.000872	97.26	92.85	41064414	6168419220	92.44	92.44	36882012 (89.82%)	2900271 (7.86%)	33981741 (92.14%)
Mb_6h_3	42937744	6449759000	6024703862	0.000865	97.51	93.4	39597552	5948017444	92.22	92.22	35488367 (89.62%)	2907195 (8.19%)	32581172 (91.81%)
Mk_24h_1	43530966	6536947678	6105921955	0.000924	97.5	93.4	40176520	6033211026	92.29	92.29	35863206 (89.26%)	2939428 (8.20%)	32923778 (91.80%)
Mk_24h_2	43320716	6506812398	6047002642	0.000884	97.28	92.93	39938864	5998848808	92.19	92.19	35627551 (89.21%)	2886524 (8.10%)	32741027 (91.90%)
Mk_24h_3	45476214	6821432100	6470272956	0.000407	98	94.85	41793126	6268968900	91.9	91.9	37349378 (89.37%)	3164583 (8.47%)	34184795 (91.53%)
Mb_24h_1	50542796	7581419400	7160244094	0.000389	97.85	94.44	46429992	6964498800	91.86	91.86	41634742 (89.67%)	3561427 (8.55%)	38073315 (91.45%)
Mb_24h_2	48755012	7313251800	6926179196	0.000389	97.9	94.7	44517684	6677652600	91.3	91.3	39874395 (89.57%)	3406220 (8.54%)	36468175 (91.46%)
Mb_24h_3	51184150	7677622500	7265973883	0.000387	97.86	94.63	46841894	7026284100	91.51	91.51	41411715 (88.41%)	3556719 (8.59%)	37854996 (91.41%)
